# Supplementary material
Source: PubMed Central journal article supplement (PMC3112547)
Supplement: tjp0589-2669-SD1.pdf [file tjp0589-2669-SD1.pdf]

## Supplementary Fig. S1.

A

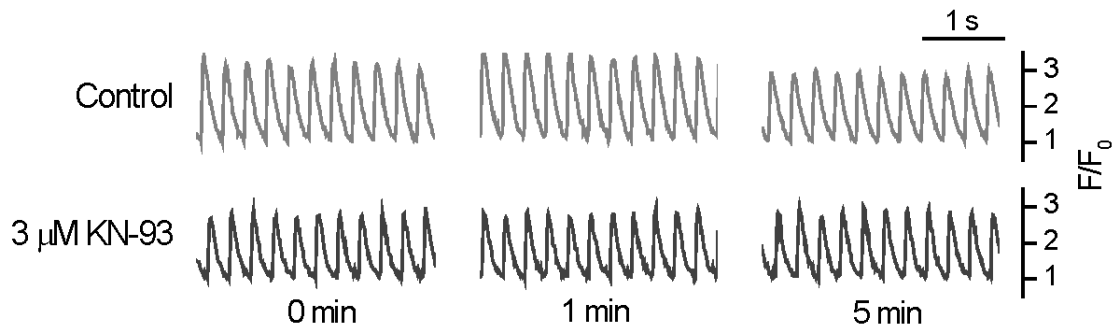

B

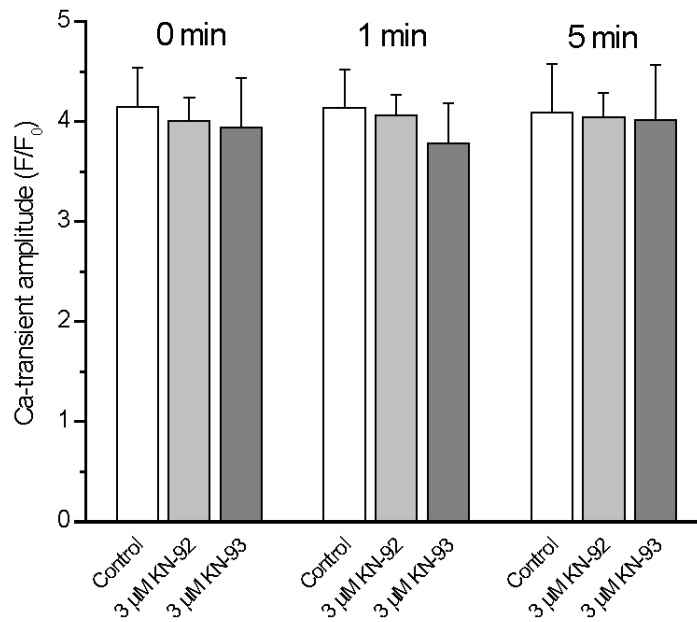

**Supplementary Fig. S1. Acute effects of KN-93 (3  $\mu$ M) and KN-92 (3  $\mu$ M) on spontaneous  $[Ca^{2+}]_i$  activity of HL-1 cardiomyocytes. A) Representative  $[Ca^{2+}]_i$  signals from Fluo-4-loaded HL-1 cardiomyocytes before (0 min), 1 minute and 5 minutes after application of KN-93 (3  $\mu$ M) (*below*) with control measurements without KN-93 at the same time points (*above*). B) Effects of KN-92 (3  $\mu$ M, n=9) and KN-93 (3  $\mu$ M, n=10) on the  $Ca^{2+}$ -transient amplitude before (0 min), at 1 minute and at 5 minutes compared to control (n=8) at the corresponding time points.**

## Supplementary Fig. S2.

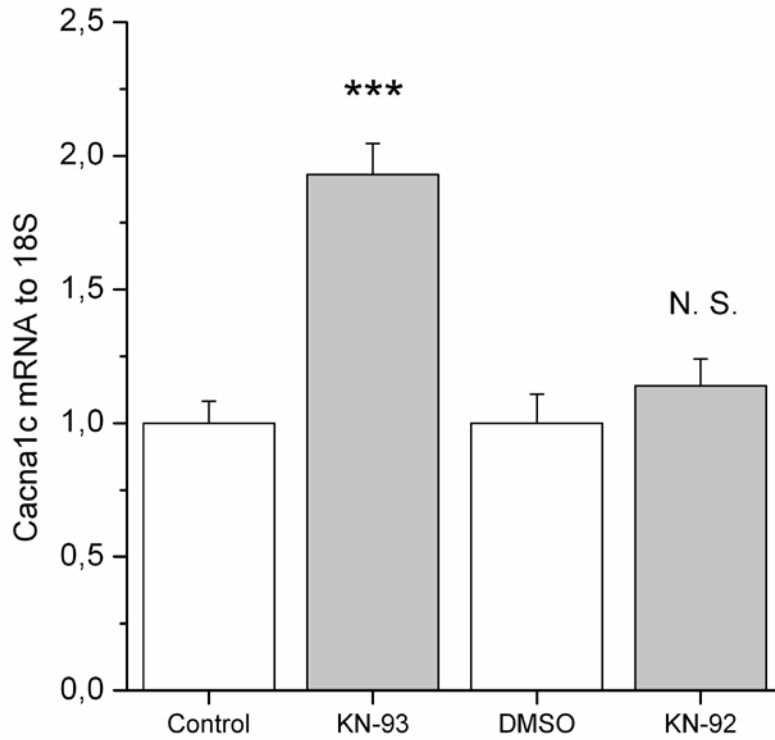

**Supplementary Fig. 2. Effects of KN-93 (3  $\mu$ M) and KN-92 (3  $\mu$ M) on Cacna1c expression in rat neonatal cardiomyocytes.** 24 h exposure to KN-93 increased Cacna1c mRNA levels significantly (1.9-fold,  $p < 0.001$ ,  $n = 6$ ) compared to control. KN-92 exposure (24 h) did not affect Cacna1c mRNA levels compared to vehicle (KN-92 solvent DMSO). \*\*\*= $p < 0.001$ , N.S.= non-significant.

### Supplementary Fig.S3.

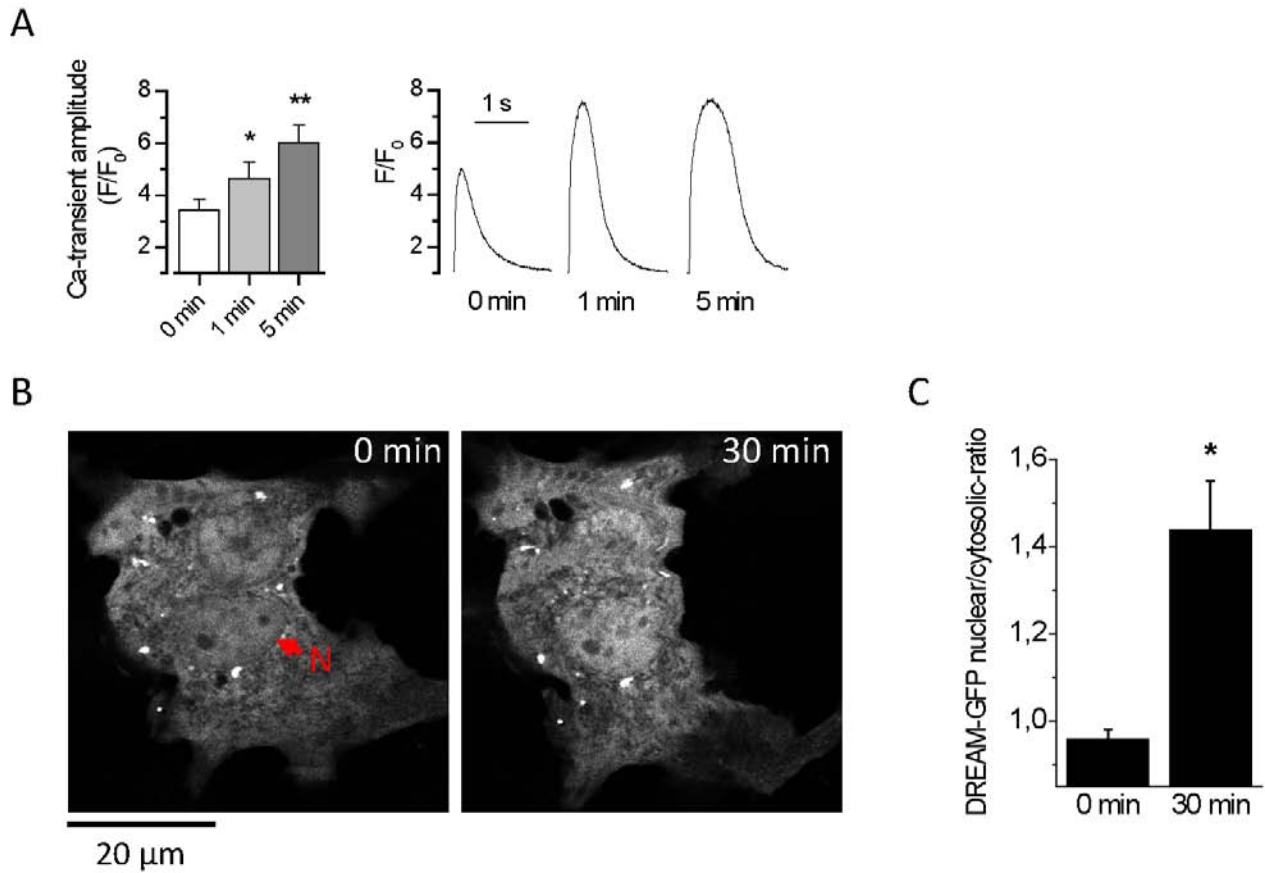

**Supplementary Fig. S3. Effects of L-type Ca-channel opener Bay K8644 on Ca<sup>2+</sup>-transients and GFP-DREAM translocation in neonatal cardiomyocytes.** **A)** Bay K8644 (5 μM) induces a statistically significant increase in the amplitude of the intracellular Ca<sup>2+</sup>-transients (F/F<sub>0</sub>-ratio of Fluo-4 fluorescence) 1 minute after application and the increase reaches a steady-state after 5 minutes (n=6). **B)** Bay K8644 (5 μM) induces nuclear translocation of GFP-DREAM with a statistically significant change in the nuclear to cytosolic ratio in 30 minutes (n=4). \*=*p*<0.05, \*\*=*p*<0.01 **C).** Red arrowhead shows the localization of the nucleus.
